# Supplementary material
Source: PubMed Central journal article supplement (PMC3070570)
Supplement: mmc2.pdf [file mmc2.pdf]

**Table 1.** Fold change in extracellular matrix gene expression for preeclamptic blood vessel versus normal pregnancy

| Gene    | Fold Up- or Down-Regulation |
|---------|-----------------------------|
|         | preeclamptic /normal        |
| THBS1   | 17,93                       |
| MMP1    | 7,38                        |
| TIMP3   | 6,34                        |
| ICAM1   | 4,33                        |
| LAMA3   | 2,74                        |
| PECAM1  | 2,66                        |
| MMP15   | 2,09                        |
| MMP14   | 2,06                        |
| THBS3   | 1,99                        |
| MMP12   | 1,98                        |
| TNC     | 1,88                        |
| COL7A1  | 1,83                        |
| NCAM1   | 1,82                        |
| MMP11   | 1,76                        |
| ITGA6   | 1,73                        |
| ITGA5   | 1,72                        |
| MMP2    | 1,67                        |
| HAS1    | 1,65                        |
| ITGB5   | 1,62                        |
| ITGA3   | 1,61                        |
| MMP16   | 1,56                        |
| SELE    | 1,56                        |
| VCAM1   | 1,55                        |
| COL15A1 | 1,55                        |
| SPARC   | 1,55                        |
| MMP3    | 1,53                        |
| SPG7    | 1,51                        |
| COL4A2  | 1,51                        |
| KAL1    | 1,51                        |
| LAMC1   | 1,50                        |
| FN1     | 1,49                        |
| COL11A1 | 1,49                        |
| TIMP2   | 1,48                        |
| COL6A2  | 1,47                        |
| ITGAV   | 1,45                        |
| COL5A1  | 1,44                        |
| COL6A1  | 1,44                        |
| ITGA4   | 1,43                        |
| THBS2   | 1,41                        |
| LAMA2   | 1,41                        |
| COL16A1 | 1,38                        |
| CTGF    | 1,36                        |
| LAMB1   | 1,35                        |
| ACTB    | 1,31                        |
| MMP10   | 1,30                        |
| VCAN    | 1,30                        |

| Gene<br>(continuation) | Fold Up- or Down-Regulation |
|------------------------|-----------------------------|
|                        | preeclamptic /normal        |
| ITGA1                  | 1,29                        |
| LAMB3                  | 1,26                        |
| COL8A1                 | 1,22                        |
| ITGB3                  | 1,22                        |
| ITGA2                  | 1,21                        |
| CTNNB1                 | 1,20                        |
| CTNND1                 | 1,19                        |
| GAPDH                  | 1,17                        |
| CTNNA1                 | 1,15                        |
| ITGB1                  | 1,14                        |
| B2M                    | 1,14                        |
| CD44                   | 1,12                        |
| COL12A1                | 1,10                        |
| SGCE                   | 1,09                        |
| TGFBI                  | 1,08                        |
| ADAMTS8                | 1,08                        |
| CDH1                   | 1,08                        |
| COL14A1                | 1,08                        |
| ITGA7                  | 1,08                        |
| ITGA8                  | 1,08                        |
| ITGAL                  | 1,08                        |
| ITGAM                  | 1,08                        |
| ITGB2                  | 1,08                        |
| ITGB4                  | 1,08                        |
| MMP13                  | 1,08                        |
| MMP7                   | 1,08                        |
| MMP9                   | 1,08                        |
| SELL                   | 1,08                        |
| SELP                   | 1,08                        |
| CLEC3B                 | 1,08                        |
| VTN                    | 1,08                        |
| SPP1                   | 1,06                        |
| RPL13A                 | 1,05                        |
| CNTN1                  | 1,02                        |
| MMP8                   | 1,00                        |
| LAMA1                  | 1,00                        |
| ADAMTS13               | -1,01                       |
| ADAMTS1                | -1,03                       |
| ECM1                   | -1,08                       |
| TIMP1                  | -2,04                       |
| COL1A1                 | -2,89                       |
| CTNND2                 | -3,07                       |
| HPRT1                  | -3,35                       |
