# Supplementary material
Source: PubMed Central journal article supplement (PMC3070570)
Supplement: mmc3.pdf [file mmc3.pdf]

**Table 2.** Fold change in VSMC extracellular matrix gene expression after treatment with neutrophils

| Gene    | Fold Up- or Down-Regulation |
|---------|-----------------------------|
|         | neutrophils /control        |
| TIMP3   | <b>7,30</b>                 |
| MMP1    | <b>5,13</b>                 |
| PECAM1  | <b>2,36</b>                 |
| THBS1   | <b>2,08</b>                 |
| ICAM1   | <b>2,01</b>                 |
| ITGA5   | 1,93                        |
| ITGA3   | 1,89                        |
| ACTB    | 1,81                        |
| MMP14   | 1,75                        |
| RPL13A  | 1,74                        |
| COL7A1  | 1,61                        |
| MMP10   | 1,57                        |
| LAMB3   | 1,52                        |
| ADAMTS1 | 1,46                        |
| MMP9    | 1,41                        |
| CNTN1   | 1,38                        |
| CD44    | 1,38                        |
| NCAM1   | 1,34                        |
| ECM1    | 1,26                        |
| CTNNB1  | 1,26                        |
| ITGB3   | 1,17                        |
| COL6A2  | 1,14                        |
| ITGA6   | 1,12                        |
| COL6A1  | 1,10                        |
| THBS3   | 1,09                        |
| CTNND1  | 1,07                        |
| TNC     | -1,00                       |
| COL8A1  | -1,04                       |
| CLEC3B  | -1,05                       |
| LAMC1   | -1,08                       |
| FN1     | -1,09                       |
| CTNNA1  | -1,10                       |
| HPRT1   | -1,13                       |
| SPG7    | -1,17                       |
| COL16A1 | -1,18                       |
| MMP2    | -1,20                       |
| MMP8    | -1,20                       |
| GAPDH   | -1,21                       |
| MMP11   | -1,26                       |
| ITGB5   | -1,29                       |
| LAMA1   | -1,30                       |
| HAS1    | -1,30                       |
| TIMP2   | -1,34                       |
| ITGA2   | -1,39                       |
| CTGF    | -1,46                       |
| MMP12   | -1,53                       |

| Gene<br>(continuation) | Fold Up- or Down-Regulation |
|------------------------|-----------------------------|
|                        | neutrophils /control        |
| LAMA3                  | -1,54                       |
| ADAMTS13               | -1,59                       |
| MMP15                  | -1,60                       |
| ADAMTS8                | -1,70                       |
| CTNND2                 | -1,70                       |
| ITGA8                  | -1,70                       |
| ITGAL                  | -1,70                       |
| ITGAM                  | -1,70                       |
| ITGB2                  | -1,70                       |
| ITGB4                  | -1,70                       |
| MMP7                   | -1,70                       |
| SELE                   | -1,70                       |
| SELL                   | -1,70                       |
| SELP                   | -1,70                       |
| SGCE                   | -1,71                       |
| TGFBI                  | -1,71                       |
| LAMB1                  | -1,82                       |
| SPARC                  | -1,91                       |
| VCAM1                  | -1,93                       |
| COL5A1                 | -1,95                       |
| COL4A2                 | <b>-2,04</b>                |
| COL1A1                 | <b>-2,13</b>                |
| ITGA4                  | <b>-2,15</b>                |
| B2M                    | <b>-2,32</b>                |
| ITGA7                  | <b>-2,38</b>                |
| THBS2                  | <b>-2,41</b>                |
| ITGB1                  | <b>-2,55</b>                |
| CDH1                   | <b>-2,61</b>                |
| COL11A1                | <b>-2,70</b>                |
| TIMP1                  | <b>-3,12</b>                |
| LAMA2                  | <b>-3,32</b>                |
| ITGAV                  | <b>-3,46</b>                |
| SPP1                   | <b>-3,82</b>                |
| COL12A1                | <b>-4,18</b>                |
| MMP3                   | <b>-4,29</b>                |
| KAL1                   | <b>-4,48</b>                |
| VCAN                   | <b>-4,73</b>                |
| MMP13                  | <b>-5,11</b>                |
| MMP16                  | <b>-5,36</b>                |
| ITGA1                  | <b>-6,55</b>                |
| COL15A1                | <b>-12,40</b>               |
| VTN                    | <b>-20,71</b>               |
| COL14A1                | <b>-52,42</b>               |
