# Supplementary material
Source: PubMed Central journal article supplement (PMC3070570)
Supplement: mmc4.pdf [file mmc4.pdf]

**Table 3.** Fold change in VSMC extracellular matrix gene expression after treatment with TNF- $\alpha$

| Gene    | Fold Up- or Down-Regulation | Gene<br>(continuation) | Fold Up- or Down-Regulation |
|---------|-----------------------------|------------------------|-----------------------------|
|         | TNF- $\alpha$ /control      |                        | TNF- $\alpha$ /control      |
| MMP9    | 9,32                        | RPL13A                 | 1,00                        |
| MMP10   | 9,19                        | GAPDH                  | 1,00                        |
| MMP1    | 7,94                        | ACTB                   | 1,00                        |
| MMP12   | 7,16                        | SPARC                  | -1,01                       |
| ICAM1   | 6,02                        | MMP11                  | -1,09                       |
| TIMP3   | 5,94                        | SGCE                   | -1,18                       |
| THBS1   | 5,94                        | LAMB1                  | -1,20                       |
| LAMP3   | 5,50                        | ITGAV                  | -1,22                       |
| ITGA5   | 3,63                        | HAS1                   | -1,30                       |
| COL7A1  | 2,83                        | COL11A1                | -1,34                       |
| ITGA3   | 2,60                        | MMP15                  | -1,37                       |
| ITGB3   | 2,36                        | ITGA2                  | -1,38                       |
| TNC     | 2,33                        | MMP13                  | -1,41                       |
| COL6A1  | 2,27                        | PECAM1                 | -1,41                       |
| COL8A1  | 2,07                        | ITGB5                  | -1,42                       |
| COL6A2  | 2,03                        | ADAMTS13               | -1,52                       |
| CD44    | 2,01                        | ITGB1                  | -1,68                       |
| MMP8    | 1,97                        | CLEC3B                 | -1,69                       |
| CTNND1  | 1,96                        | COL5A1                 | -1,71                       |
| CTNNB1  | 1,95                        | LAMA2                  | -1,77                       |
| CNTN1   | 1,93                        | COL1A1                 | -1,79                       |
| LAMA1   | 1,84                        | FN1                    | -2,06                       |
| CTNNA1  | 1,79                        | VCAN                   | -2,27                       |
| LAMA3   | 1,77                        | TIMP1                  | -2,31                       |
| COL16A1 | 1,74                        | THBS2                  | -2,33                       |
| SELE    | 1,62                        | TGFB1                  | -2,39                       |
| MMP2    | 1,57                        | ITGA1                  | -2,53                       |
| ADAMTS1 | 1,56                        | SPP1                   | -2,60                       |
| THBS3   | 1,52                        | ITGA4                  | -2,69                       |
| CDH1    | 1,45                        | COL12A1                | -2,91                       |
| ITGA6   | 1,32                        | VCAM1                  | -3,07                       |
| ITGA7   | 1,27                        | MMP3                   | -3,36                       |
| SPG7    | 1,27                        | MMP16                  | -3,89                       |
| TIMP2   | 1,27                        | KAL1                   | -3,97                       |
| NCAM1   | 1,16                        | COL4A2                 | -4,38                       |
| CTGF    | 1,07                        | MMP14                  | -6,41                       |
| ADAMTS8 | 1,00                        | ECM1                   | -6,54                       |
| CTNND2  | 1,00                        | COL15A1                | -7,41                       |
| ITGA8   | 1,00                        | VTN                    | -20,25                      |
| ITGAL   | 1,00                        | COL14A1                | -29,65                      |
| ITGAM   | 1,00                        | LAMC1                  | -32,22                      |
| ITGB2   | 1,00                        |                        |                             |
| ITGB4   | 1,00                        |                        |                             |
| MMP7    | 1,00                        |                        |                             |
| SELL    | 1,00                        |                        |                             |
| SELP    | 1,00                        |                        |                             |
| B2M     | 1,00                        |                        |                             |
| HPRT1   | 1,00                        |                        |                             |
