# Supplementary material
Source: PubMed Central journal article supplement (PMC3070570)
Supplement: mmc5.pdf [file mmc5.pdf]

**Table 4.** Fold change in VSMC extracellular matrix gene expression after treatment with ROS

| Gene     | Fold Up- or Down-Regulation | Gene<br>(continuation) | Fold Up- or Down-Regulation |
|----------|-----------------------------|------------------------|-----------------------------|
|          | ROS /Control                |                        | ROS /Control                |
| MMP1     | 18,79                       | ADAMTS8                | -1,41                       |
| MMP10    | 14,54                       | CTNND2                 | -1,41                       |
| MMP3     | 5,43                        | ITGA8                  | -1,41                       |
| MMP12    | 4,93                        | ITGAL                  | -1,41                       |
| ICAM1    | 3,64                        | ITGAM                  | -1,41                       |
| MMP14    | 3,14                        | ITGB2                  | -1,41                       |
| TIMP3    | 2,75                        | ITGB4                  | -1,41                       |
| SPP1     | 2,66                        | MMP7                   | -1,41                       |
| CD44     | 2,27                        | SELE                   | -1,41                       |
| ITGA2    | 2,22                        | SELL                   | -1,41                       |
| ADAMTS1  | 2,12                        | SELP                   | -1,41                       |
| ITGA3    | 1,88                        | CTGF                   | -1,42                       |
| RPL13A   | 1,78                        | COL8A1                 | -1,45                       |
| THBS1    | 1,58                        | LAMA1                  | -1,47                       |
| PECAM1   | 1,52                        | SPARC                  | -1,52                       |
| CNTN1    | 1,51                        | FN1                    | -1,55                       |
| CTNNB1   | 1,47                        | CDH1                   | -1,55                       |
| CTNNA1   | 1,39                        | B2M                    | -1,58                       |
| MMP8     | 1,32                        | ITGA4                  | -1,61                       |
| MMP15    | 1,30                        | COL16A1                | -1,75                       |
| ITGA6    | 1,29                        | SGCE                   | -1,79                       |
| ITGA5    | 1,22                        | TNC                    | -1,90                       |
| HPRT1    | 1,13                        | LAMB1                  | -1,93                       |
| LAMB3    | 1,10                        | ITGAV                  | -2,01                       |
| ECM1     | 1,07                        | LAMA2                  | -2,05                       |
| THBS3    | 1,07                        | TGFBI                  | -2,14                       |
| ITGB3    | 1,05                        | MMP9                   | -2,14                       |
| COL6A2   | 1,05                        | ITGA7                  | -2,41                       |
| LAMA3    | -1,01                       | TIMP2                  | -2,56                       |
| LAMC1    | -1,03                       | THBS2                  | -2,60                       |
| ACTB     | -1,03                       | MMP16                  | -2,99                       |
| SPG7     | -1,03                       | KAL1                   | -3,09                       |
| ITGB1    | -1,07                       | COL5A1                 | -3,11                       |
| NCAM1    | -1,08                       | COL11A1                | -3,16                       |
| MMP2     | -1,10                       | ITGA1                  | -3,24                       |
| CLEC3B   | -1,11                       | COL4A2                 | -3,27                       |
| TIMP1    | -1,16                       | VCAM1                  | -3,31                       |
| COL7A1   | -1,16                       | VCAN                   | -3,94                       |
| ADAMTS13 | -1,18                       | HAS1                   | -4,19                       |
| MMP13    | -1,20                       | COL1A1                 | -4,25                       |
| COL6A1   | -1,22                       | COL12A1                | -4,99                       |
| GAPDH    | -1,24                       | COL15A1                | -7,40                       |
| ITGB5    | -1,25                       | VTN                    | -11,54                      |
| CTNND1   | -1,28                       | COL14A1                | -52,64                      |
| MMP11    | -1,36                       |                        |                             |
